# Supplementary material
Source: Springer Nature journal article supplement (https://www.springermedizin.de/resource/supplementary/13012_2006_44_MOESM2_ESM.pdf/9629126)
Supplement: MOESM2 [file 9629126]

*Search Strategy by Database*

| CINAHL (1982-February 2006)                                                                                                                                                                                                                                                                                                                                                                                                                                                                                                                                                                                                                                                                                                                                                                                                                                                                                                                                                                                                                                                                                                                                                                                                                                                                                                                                                                                                                | Medline (1966-February 2006)                                                                                                                                                                                                                                                                                                                                                                                                                                                                                                                                                                                                                                                                                                                                                                                                                                                                                                                                                                                                                                                                                                                                                                                                                                         |
|--------------------------------------------------------------------------------------------------------------------------------------------------------------------------------------------------------------------------------------------------------------------------------------------------------------------------------------------------------------------------------------------------------------------------------------------------------------------------------------------------------------------------------------------------------------------------------------------------------------------------------------------------------------------------------------------------------------------------------------------------------------------------------------------------------------------------------------------------------------------------------------------------------------------------------------------------------------------------------------------------------------------------------------------------------------------------------------------------------------------------------------------------------------------------------------------------------------------------------------------------------------------------------------------------------------------------------------------------------------------------------------------------------------------------------------------|----------------------------------------------------------------------------------------------------------------------------------------------------------------------------------------------------------------------------------------------------------------------------------------------------------------------------------------------------------------------------------------------------------------------------------------------------------------------------------------------------------------------------------------------------------------------------------------------------------------------------------------------------------------------------------------------------------------------------------------------------------------------------------------------------------------------------------------------------------------------------------------------------------------------------------------------------------------------------------------------------------------------------------------------------------------------------------------------------------------------------------------------------------------------------------------------------------------------------------------------------------------------|
| <ol style="list-style-type: none"><li>1. exp NURSING CARE/</li><li>2. exp NURSES/</li><li>3. exp Practice Guidelines/</li><li>4. exp AUDIOVISUALS/</li><li>5. exp PAMPHLETS/</li><li>6. exp "POLICY AND PROCEDURE MANUALS"/</li><li>7. exp Nursing Protocols/</li><li>8. exp Staff Development/</li><li>9. inservice\$.mp.</li><li>10. exp "Seminars and Workshops"/</li><li>11. exp Education, Clinical/</li><li>12. exp Clinical Nurse Specialists/</li><li>13. exp Nurse Practitioners/</li><li>14. exp Staff Development Instructors/</li><li>15. exp Nurse Consultants/</li><li>16. (chang\$ adj2 agent\$).mp.</li><li>17. (facilitat\$ adj2 change\$).mp.</li><li>18. (coordinat\$ adj2 change\$).mp.</li><li>19. exp Quality Assurance/</li><li>20. (critical adj1 appraisal).mp.</li><li>21. exp Quality Improvement/</li><li>22. exp Reminder Systems/</li><li>23. (champion\$ adj1 change\$).mp.</li><li>24. exp "Diffusion of Innovation"/</li><li>25. exp Nursing Practice, Research-Based/</li><li>26. evidence based nursing.mp.</li><li>27. (utilizat\$ or utilisat\$ or uptake or transfer\$ or implement\$ or disseminat\$ or diffusion\$ or translat\$).mp.</li><li>28. journal club.mp.</li><li>29. exp Nursing Practice, Evidence-Based/</li><li>30. 1 or 2</li><li>31. or/3-23</li><li>32. 31 or 28</li><li>33. or/24-27</li><li>34. 33 or 29</li><li>35. 30 and 32 and 34</li><li>36. limit 35 to research</li></ol> | <ol style="list-style-type: none"><li>1. exp NURSING/</li><li>2. exp NURSES/</li><li>3. exp Practice Guidelines/</li><li>4. exp AUDIOVISUAL AIDS/</li><li>5. exp PAMPHLETS/</li><li>6. exp MANUALS/</li><li>7. exp CLINICAL PROTOCOLS/</li><li>8. exp Inservice Training/</li><li>9. seminar.mp.</li><li>10. workshop.mp.</li><li>11. clinical education.mp.</li><li>12. exp Nurse Clinicians/</li><li>13. clinical nurse specialist\$.mp.</li><li>14. exp Nurse Practitioners/</li><li>15. nurse educator\$.mp.</li><li>16. staff instructor\$.mp.</li><li>17. exp Consultants/</li><li>18. exp Nurse Clinicians/</li><li>19. (chang\$ adj2 agent\$).mp.</li><li>20. (facilitator\$ adj2 chang\$).mp.</li><li>21. (coordinator\$ adj2 chang\$).mp.</li><li>22. (champion\$ adj2 chang\$).mp.</li><li>23. journal club.mp.</li><li>24. exp Quality Assurance, Health Care/</li><li>25. exp REMINDER SYSTEMS/</li><li>26. exp "Diffusion of Innovation"/</li><li>27. exp Evidence-Based Medicine/</li><li>28. exp Nursing Research/</li><li>29. (utilizat\$ or utilisat\$ or uptake or transfer\$ or implement\$ or disseminat\$ or diffusion\$ or translat\$).mp.</li><li>30. 1 or 2</li><li>31. or/3-25</li><li>32. or/26-29</li><li>33. 30 and 31 and 32</li></ol> |

PsychINFO (1887-February 2006)

- exp NURSING/
2. exp NURSES/
3. exp Treatment Guidelines/
4. exp EDUCATIONAL AUDIOVISUAL AIDS/
5. pamphlets.mp.
6. (policy and procedure).mp. [mp=title, abstract, subject headings, table of contents, key concepts]
7. protocol.mp.
8. exp Professional Development/
9. inservice.mp.
10. workshop.mp.
11. seminar.mp.
12. clinical nurse specialist.mp.
13. nurse practitioner.mp.
14. instructor.mp.
15. nurse consultant.mp.
16. (chang\$ adj2 agent\$).mp.
17. (facilitat\$ adj2 chang\$).mp.
18. (coordinat\$ adj2 change).mp.
19. exp "Quality of Services"/
20. (critical adj1 appraisal).mp.
21. reminder\$.mp.
22. (champion\$ adj1 change\$).mp.
23. diffusion of innovation.mp.
24. exp Decision Making/
25. (research and (utiliz\$ or utilis\$ or uptake or transfer or implement\$ or disseminat\$ or translat\$)).mp. [mp=title, abstract, subject headings, table of contents, key concepts]
26. (knowledge and (utiliz\$ or utilis\$ or uptake or transfer or implement\$ or disseminat\$ or translat\$)).mp. [mp=title, abstract, subject headings, table of contents, key concepts]
27. (evidence adj1 practice).mp.
28. journal club.mp.
29. 1 or 2
30. or/2-22
31. 30 or 28
32. or/23-27
33. 29 and 31 and 32

HealthSTAR/Non-medlie (1975-February 2006)

- 1.exp NURSING/
2. exp NURSES/
3. exp Practice Guidelines/
4. exp AUDIOVISUAL AIDS/
5. exp PAMPHLETS/
6. exp MANUALS/
7. exp CLINICAL PROTOCOLS/
8. exp Inservice Training/
9. seminar.mp.
10. workshop.mp.
11. clinical education.mp.
12. exp Nurse Clinicians/
13. clinical nurse specialist\$.mp.
14. exp Nurse Practitioners/
15. nurse educator\$.mp.
16. staff instructor\$.mp.
17. exp Consultants/
18. exp Nurse Clinicians/
19. (chang\$ adj2 agent\$).mp.
20. (facilitator\$ adj2 chang\$).mp.
21. (coordinator\$ adj2 chang\$).mp.
22. (champion\$ adj2 chang\$).mp.
23. journal club.mp.
24. exp Quality Assurance, Health Care/
25. exp REMINDER SYSTEMS/
26. exp "Diffusion of Innovation"/
27. exp Evidence-Based Medicine/
28. exp Nursing Research/
29. (utilizat\$ or utilisat\$ or uptake or transfer\$ or implement\$ or disseminat\$ or diffusion\$ or translat\$).mp.
30. 1 or 2
31. or/3-25
32. or/26-29
33. 30 and 31 and 32
34. limit 33 to nonmedline

ERIC (1966-February 2006)

1. nurs\*.tx
2. (practice guidelines).tx
3. audiovisual.tx
4. (policy and procedure).tx
5. protocol\*.tx
6. (staff development).tx
7. (in service).tx
8. seminar.tx
9. workshop.tx
10. (journal club).tx
11. (clinical education).tx
12. (clinical nurse specialist).tx
13. (nurse practitioner).tx
14. instructor.tx
15. consultant.tx
16. (change agent).tx
17. champion.tx
18. coordinator.tx
19. facilitator.tx
20. (clinical educator).tx
21. (quality assurance).tx
22. (critical appraisal).tx
23. (quality improvement).tx
24. (reminder).tx
25. or/2-24
26. 1 and 25
